# Supplementary material for: Using Strahler's analysis to reduce up to 200-fold the run time of realistic neuron models
Source: PubMed Central journal article supplement — Sci Rep. 2013 Oct 14;3:2934. doi: 10.1038/srep02934 (PMC3796311; doi:10.1038/srep02934), 2013-10-14

## Supplementary Material for the paper:

*Using Strahler's analysis to reduce up to 200-fold the run time of realistic neuron models*

by

*Addolorata Marasco, Alessandro Limongiello and Michele Migliore*

**Supplementary Figure 1: The cells used in this paper and the four areas used for synaptic stimulations;** projection to the XY plane of 3D reconstructions of Purkinje cells from different animals, as indicated in the table. Colors indicate the different dendritic areas used to stimulate each cell.

**Supplementary Figure 2: I/O properties of a Purkinje cell model;** **a)** representation of the stimulation conditions; colored dendrites represent typical partial and segregated areas; **b)** (left) average ( $n = 5, \pm sd$ ) APs frequency and ISIs for 1000 synaptic inputs; (right) average firing frequency and ISIs with randomly activated synaptic inputs (Poisson) at 80 Hz; **c)** (left) raster plots of the spike trains (plots above traces), and somatic potential for cell *e4cb2a2* during simulations with 1000 synapses; grey areas in raster plots indicate regular spiking, with the first ISI of each pattern darker; blank areas indicate pauses; (right) normalized ISIs distribution. Average  $CV_2 = 0.38$  for full and partial, 0.37 for segregated stimulation.

**Supplementary Figure 3: The method is robust for perturbations of peak ionic conductances.**

(left) average trace accuracy for simulations using the original set of values,  $g_{peak}$ , for the 12 peak ionic conductances (black) or after 10 random perturbations (red) redrawn from a normal distribution with average  $g_{peak}$  and variance 10%  $g_{peak}$ , resulting in a maximum perturbation  $>20\%$  of  $g_{peak}$ ; different symbols indicate results obtained for full (circles), partial (triangles), and segregated (squares) stimulations; (right) percent of statistically indistinguishable ISIs from simulations using the realistic and the reduced model, compared pairwise (Wilcoxon Signed Rank test); all simulations were carried out using cell *e4cb3a1*.

**Supplementary Figure 4: The reduced model is able to reproduce the differential effect of two synaptic inputs colocalized or at two different locations.** (*left*) the full and the reduced morphologies of cell *p19*, and their somatic potential during simulations with two identical synapses targeting the same location (loc.1) or two different branches (loc 1 and 2).

**Supplementary Figure 5: The method is extremely accurate and quite robust for most morphologies and under all conditions of stimulation.** Average accuracy and percent of spikes times statistically indistinguishable for each cell as a function of the average synaptic stimulation frequency under different stimulation conditions; average results calculated from 550 (full), 500 (partial), and 600 (segregated) simulations. In all cases the dendrites were clustered using Strahler's order  $s = 5$  (see *Methods*), and statistics was calculated from pairwise comparison of the traces from each simulation.

**Supplementary Figure 6: In several cases, a 3-compartment reduction gave ISIs statistically different from the full model but still high overall trace accuracy.** **A)** Full and reduced model of cells *purk2* (*left*) and *p20* (*right*); **B)** (*top*) Somatic membrane potential of cell *purk2* during a simulation with 1000 synchronous synapses activating at a random (Poisson) average frequency of 120 Hz; (*bottom*) Somatic membrane potential of cell *p20* during a simulation with 1000 synchronous synapses activated by a random (Poisson) average frequency of 160 Hz. In both cases, we used a *full* stimulation protocol (see *Methods*) and the ISIs were statistically different between the full and reduced model (Wilcoxon Rank Sum test,  $p < 0.001$ ). The trace accuracy was 0.86 (*purk2*) and 0.89 (*p20*).

**Supplementary Figure 7: The method works also for CA1 pyramidal neurons.** **a)** somatic membrane potential for a full of a hippocampal pyramidal CA1 neuron (*blue* traces, cell *c70863* from Marasco et al., 2012) and the corresponding reduced model (*red* traces) during a simulation activating 140 (*left*) or 400 (*right*) randomly distributed synapses. **b)** Average number of APs ( $\pm$ sd) elicited in 500 ms long simulations as a function of the number of synaptic inputs activated in the full model (*blue* plots) or reduced (*red* plots) using the

method discussed in this paper (*left*), or a previous method with (middle) or without (*right*) the calculation of the *max Stim* parameter (19); all simulations were carried out as in ref.(19).

**Supplementary Table:**

|                        | <b>alxP</b> | <b>e1cb4a1</b> | e1cb4a5 | e4cb2a2 | e4cb3a1 | <b>p19</b>   | p20   | purk1 | purk2 | purk3 |
|------------------------|-------------|----------------|---------|---------|---------|--------------|-------|-------|-------|-------|
| smooth                 | <b>72</b>   | <b>57</b>      | 56      | 58      | 56      | <b>82</b>    | 49    | 81    | 56    | 74    |
| spiny                  | <b>851</b>  | <b>630</b>     | 633     | 660     | 685     | <b>1055</b>  | 650   | 863   | 784   | 760   |
| S1                     | <b>462</b>  | <b>344</b>     | 345     | 360     | 371     | <b>568</b>   | 349   | 472   | 420   | 417   |
| S2                     | <b>253</b>  | <b>193</b>     | 202     | 223     | 221     | <b>341</b>   | 202   | 266   | 258   | 243   |
| S3                     | <b>136</b>  | <b>93</b>      | 86      | 77      | 93      | <b>146</b>   | 99    | 125   | 106   | 100   |
| S4                     | <b>46</b>   | <b>34</b>      | 30      | 40      | 40      | <b>53</b>    | 30    | 42    | 30    | 55    |
| S5                     | <b>17</b>   | <b>14</b>      | 22      | 11      | 14      | <b>24</b>    | 9     | 26    | 24    | 17    |
| S6                     | <b>9</b>    | <b>9</b>       | 4       | 7       | 2       | <b>3</b>     | 8     | 7     | 1     | 1     |
| S7                     | <b>0</b>    | <b>0</b>       | 0       | 0       | 0       | <b>1</b>     | 1     | 5     | 1     | 1     |
| S8                     | <b>0</b>    | <b>0</b>       | 0       | 0       | 0       | <b>1</b>     | 1     | 1     | 0     | 0     |
| R <sub>in, full</sub>  | <b>66</b>   | <b>36</b>      | 74      | 60      | 53      | <b>21</b>    | 26    | 11    | 13    | 14    |
| tot. area              | <b>9937</b> | <b>24303</b>   | 10638   | 11130   | 9379    | <b>39834</b> | 24867 | 55628 | 39861 | 46586 |
| <b>3-comp</b>          |             |                |         |         |         |              |       |       |       |       |
| R <sub>in, 3comp</sub> | <b>89</b>   | <b>37</b>      | 96      | 75      | 73      | <b>25</b>    | 28    | 17    | 17    | 19    |
| soma                   | <b>553</b>  | <b>922</b>     | 511     | 990     | 800     | <b>730</b>   | 750   | 1521  | 1521  | 1521  |
| C 1                    | <b>850</b>  | <b>1787</b>    | 722     | 847     | 1356    | <b>2719</b>  | 1892  | 5395  | 5101  | 4107  |
| C 2                    | <b>586</b>  | <b>1500</b>    | 723     | 646     | 480     | <b>2114</b>  | 1457  | 3300  | 2658  | 3251  |

**Supplementary Table:** For each full morphology the following are reported: the number of smooth and spiny dendrites, the number of compartments with different Strahler's number ( $S$ ), the input resistance ( $R_{in}$ , in  $M\Omega$ ), and the total membrane area (in  $\mu m^2$ ). The bottom part of the Table reports parameters (input resistance, and membrane area) for the 3-compartment reduction for all morphologies; C1 and C2 are the compartments used to implement the smooth and spiny dendrites, respectively, whereas the soma is the same as in the full morphology; highlighted in red are the cells for which a 3-compartment reduction gave the best results.

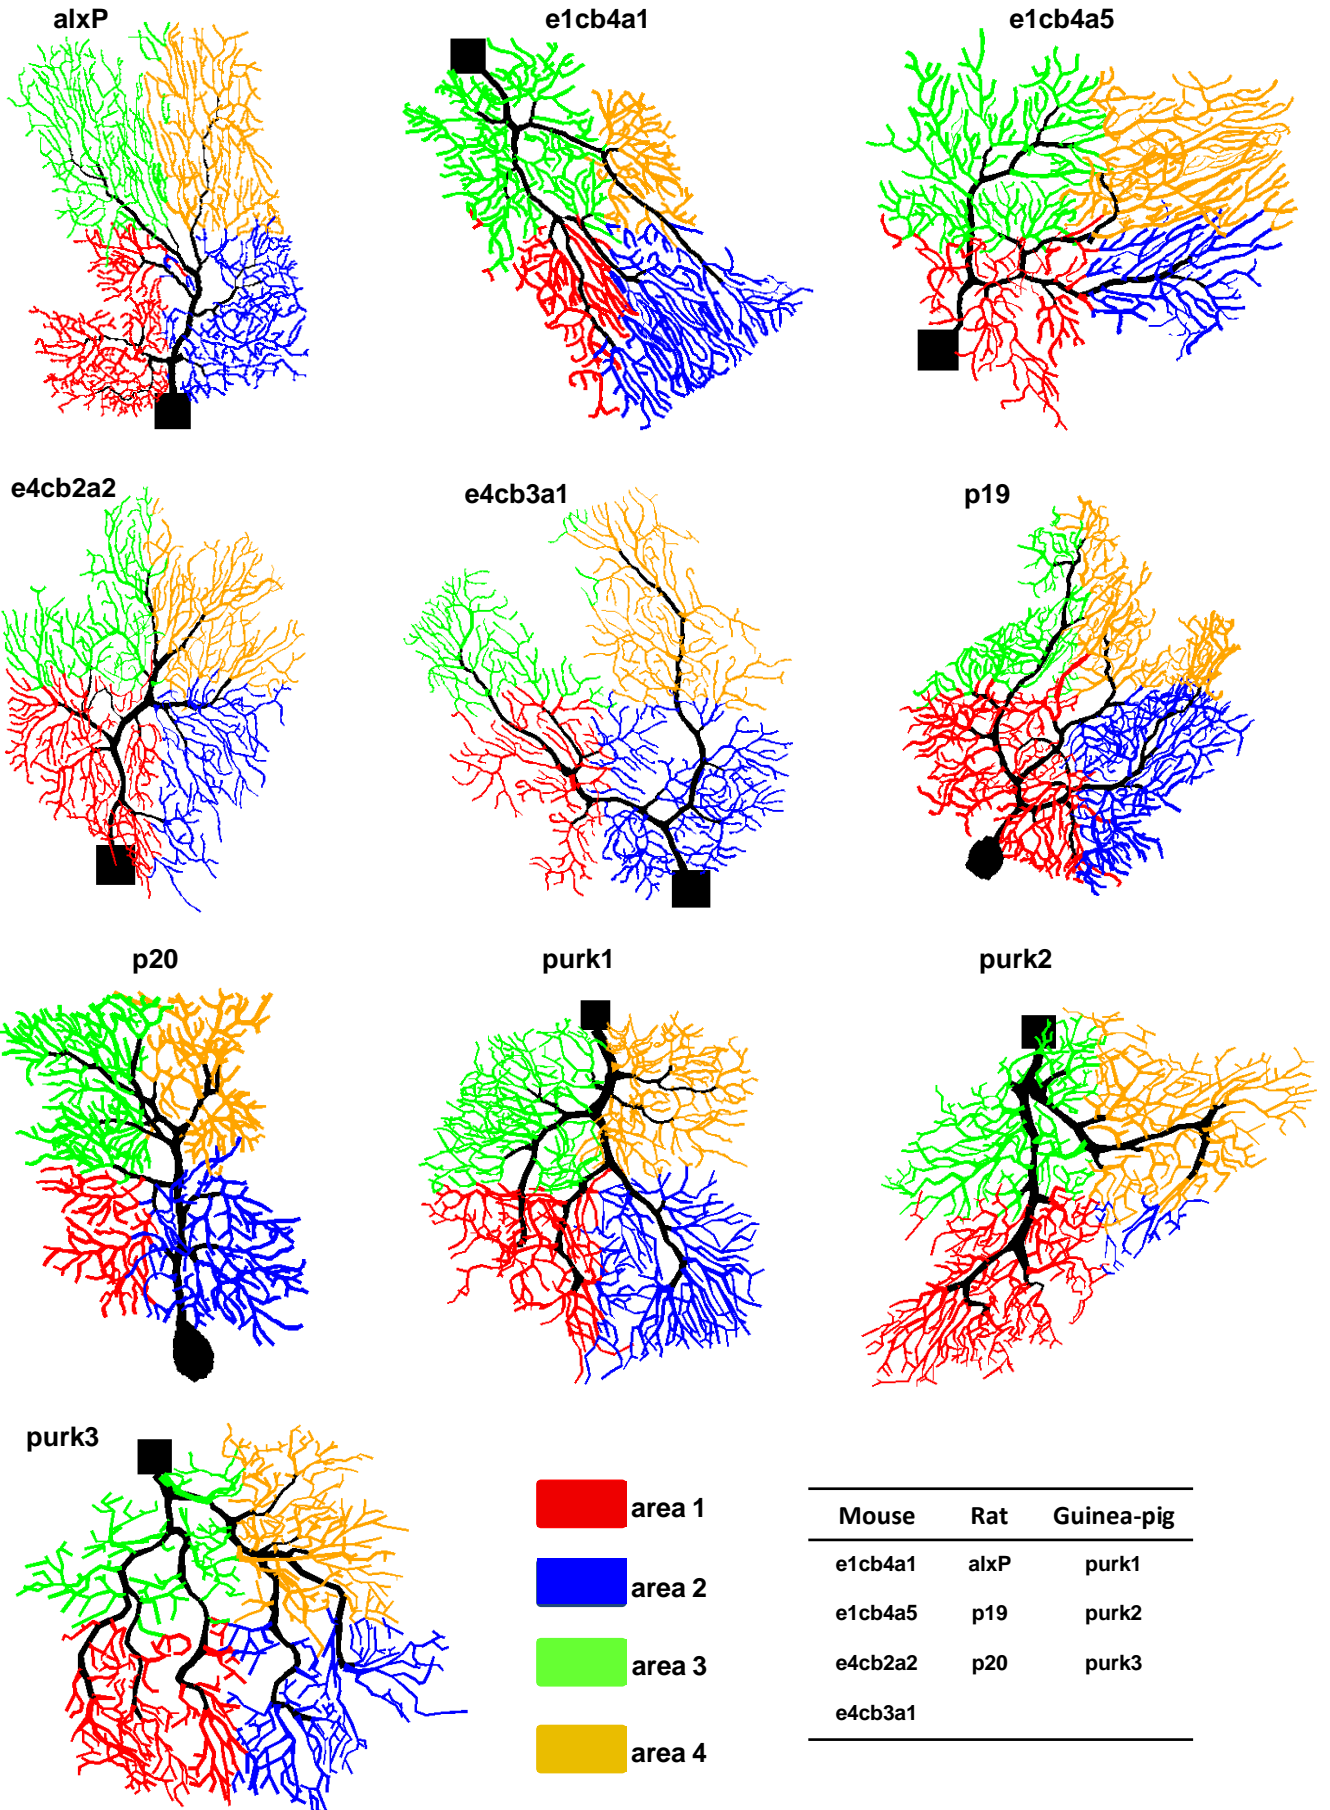

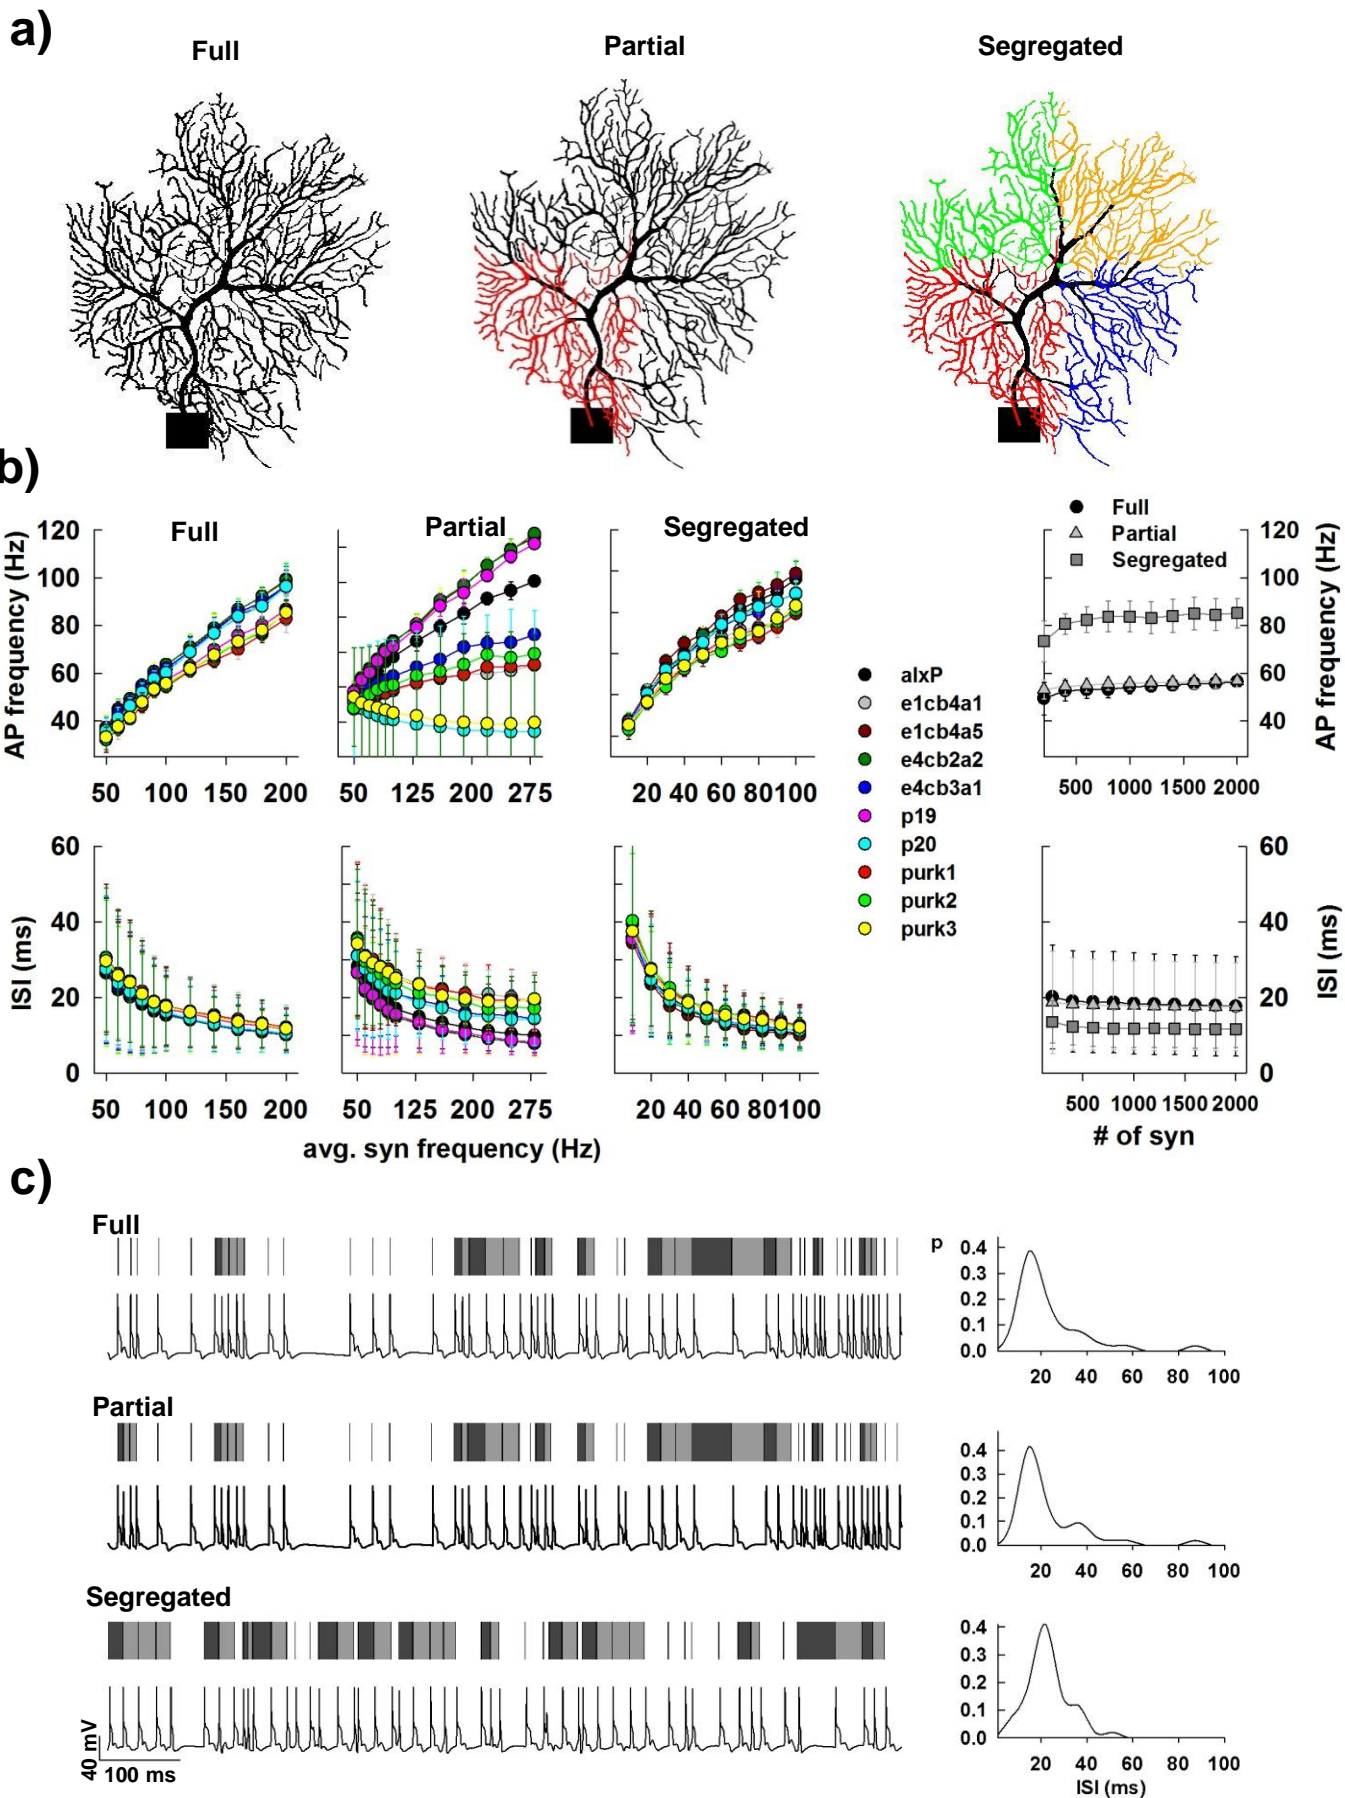

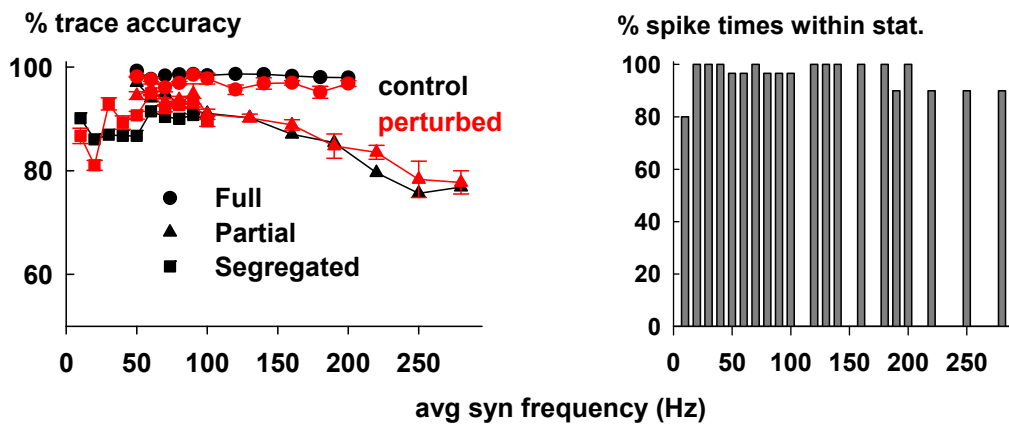

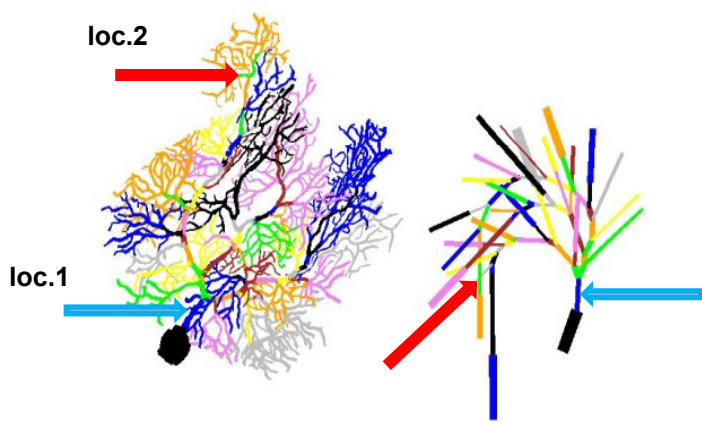

both syn on loc.1

syn on loc.1 and 2

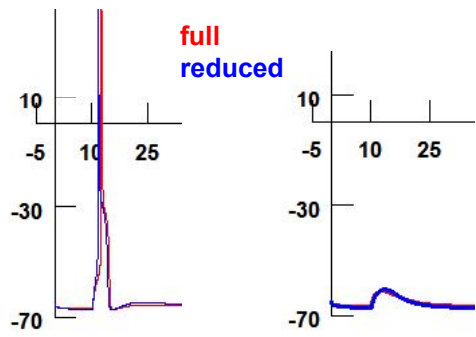



### Full

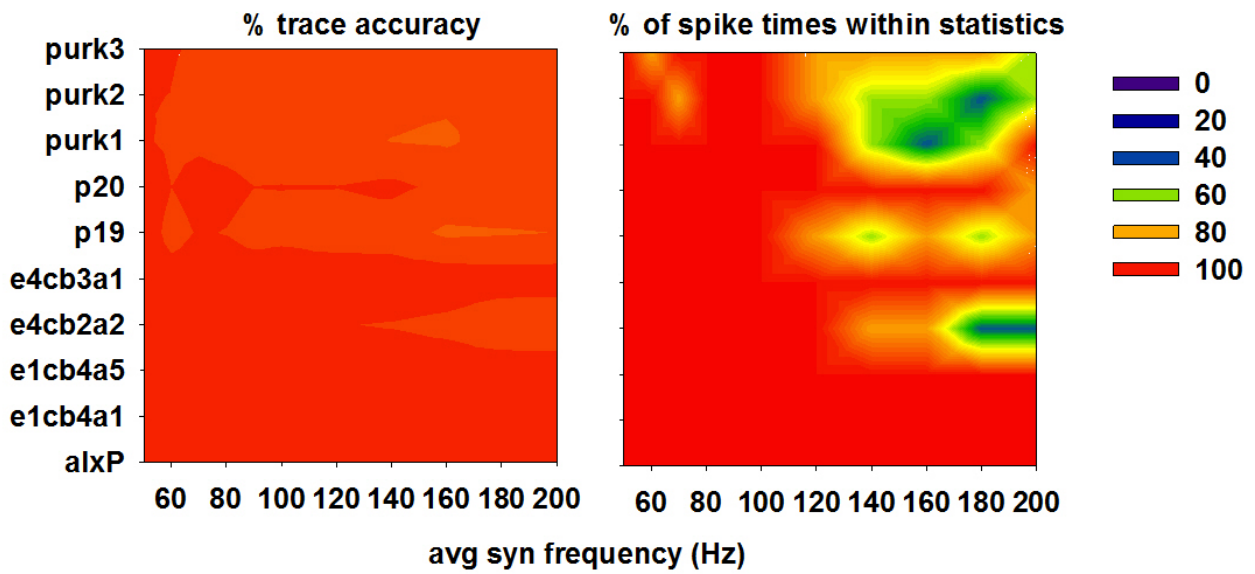

### Partial

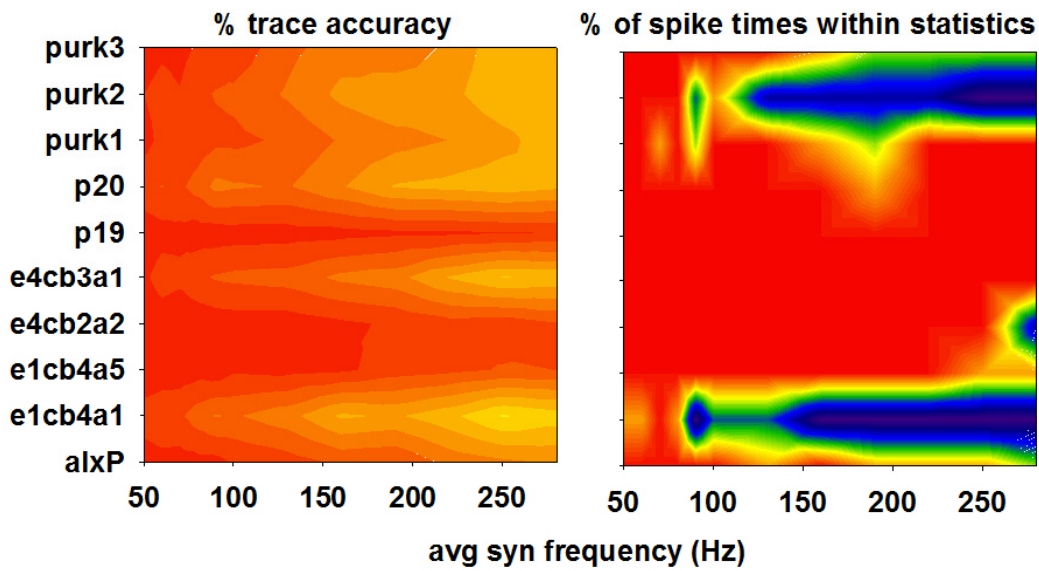

### Segregated

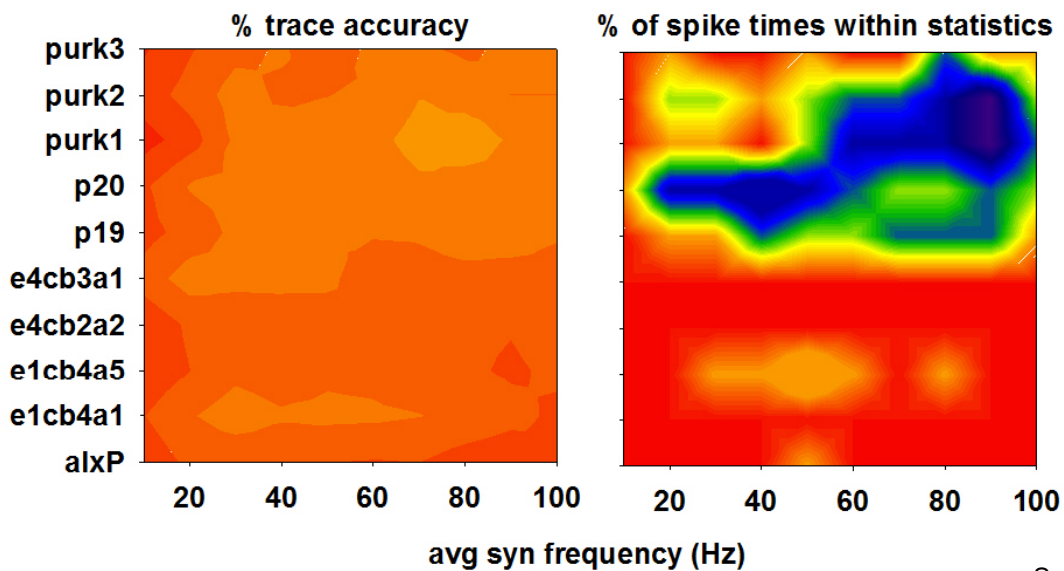

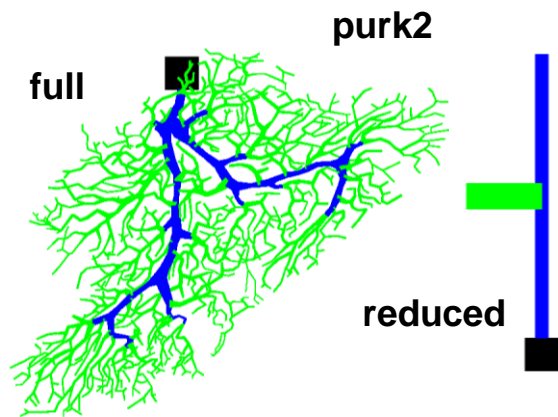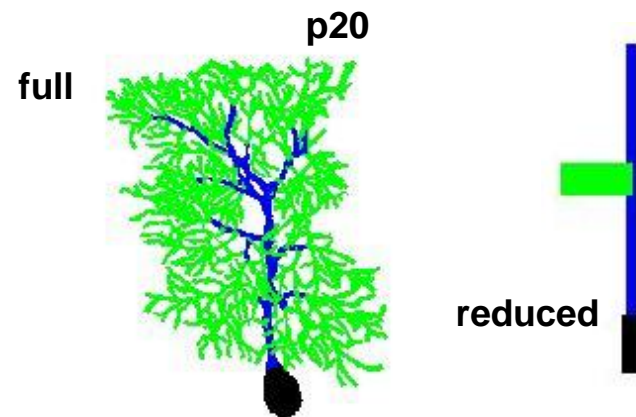

**purk2, 1000 syn, full stim, 120 Hz**

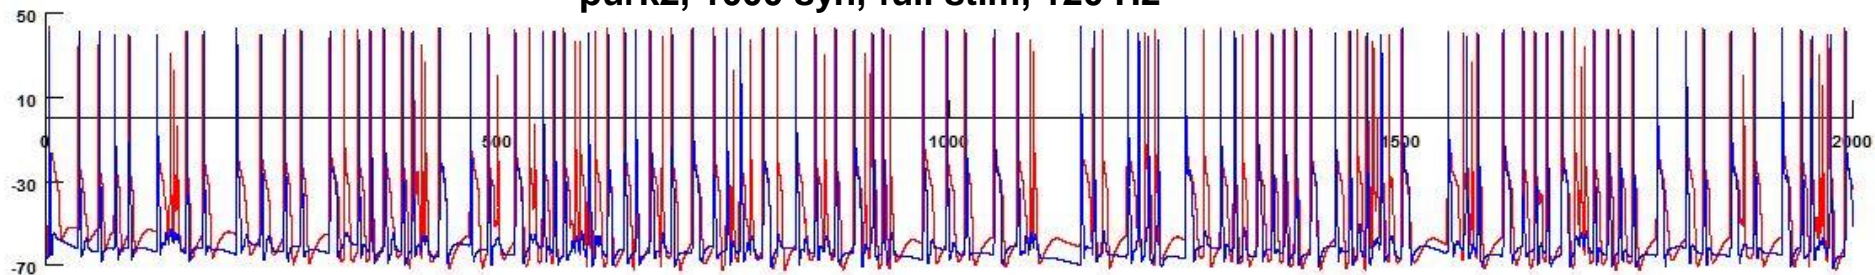

**full reduced**

**p20, 1000 syn, full stim, 160 Hz**

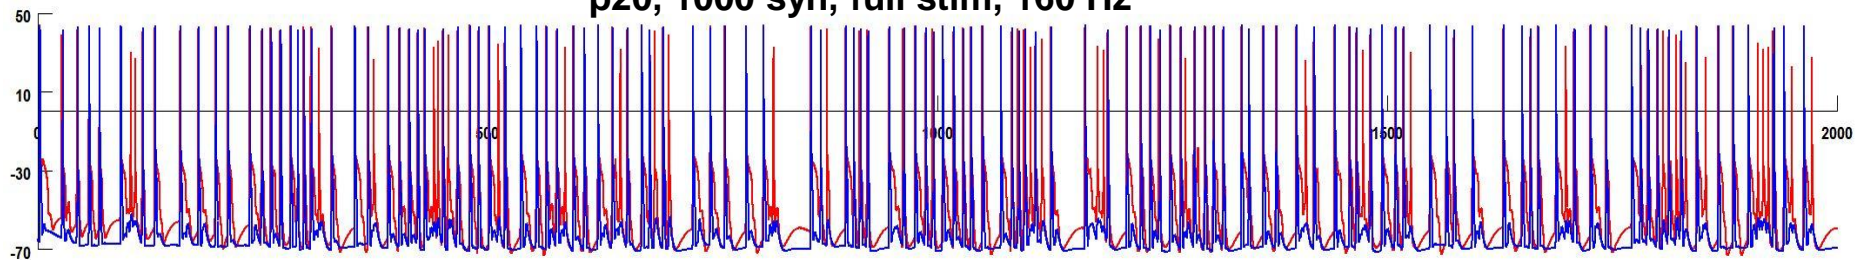

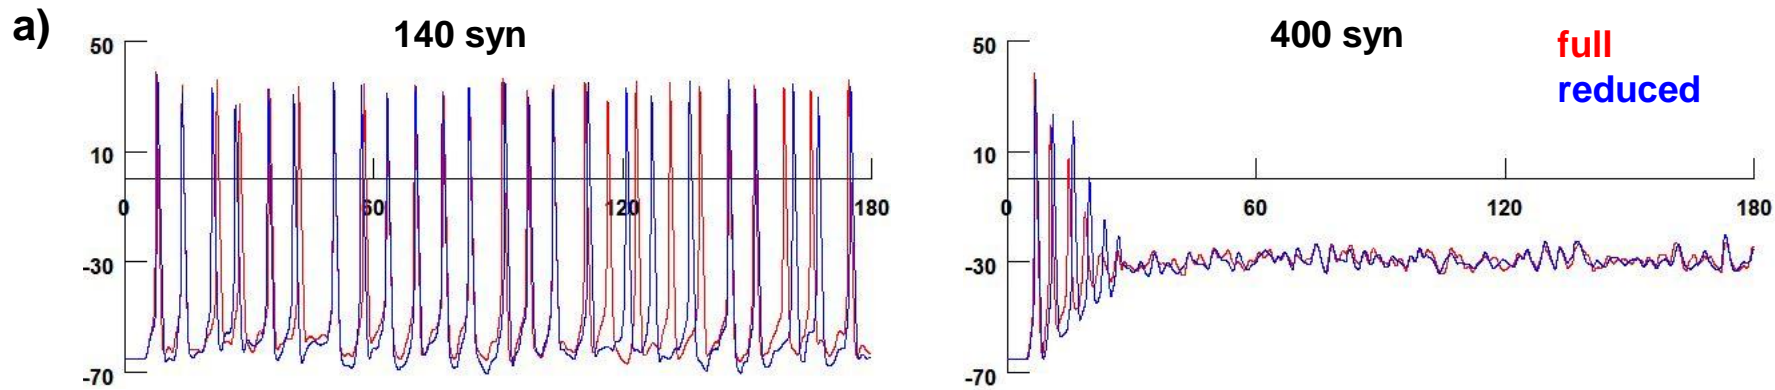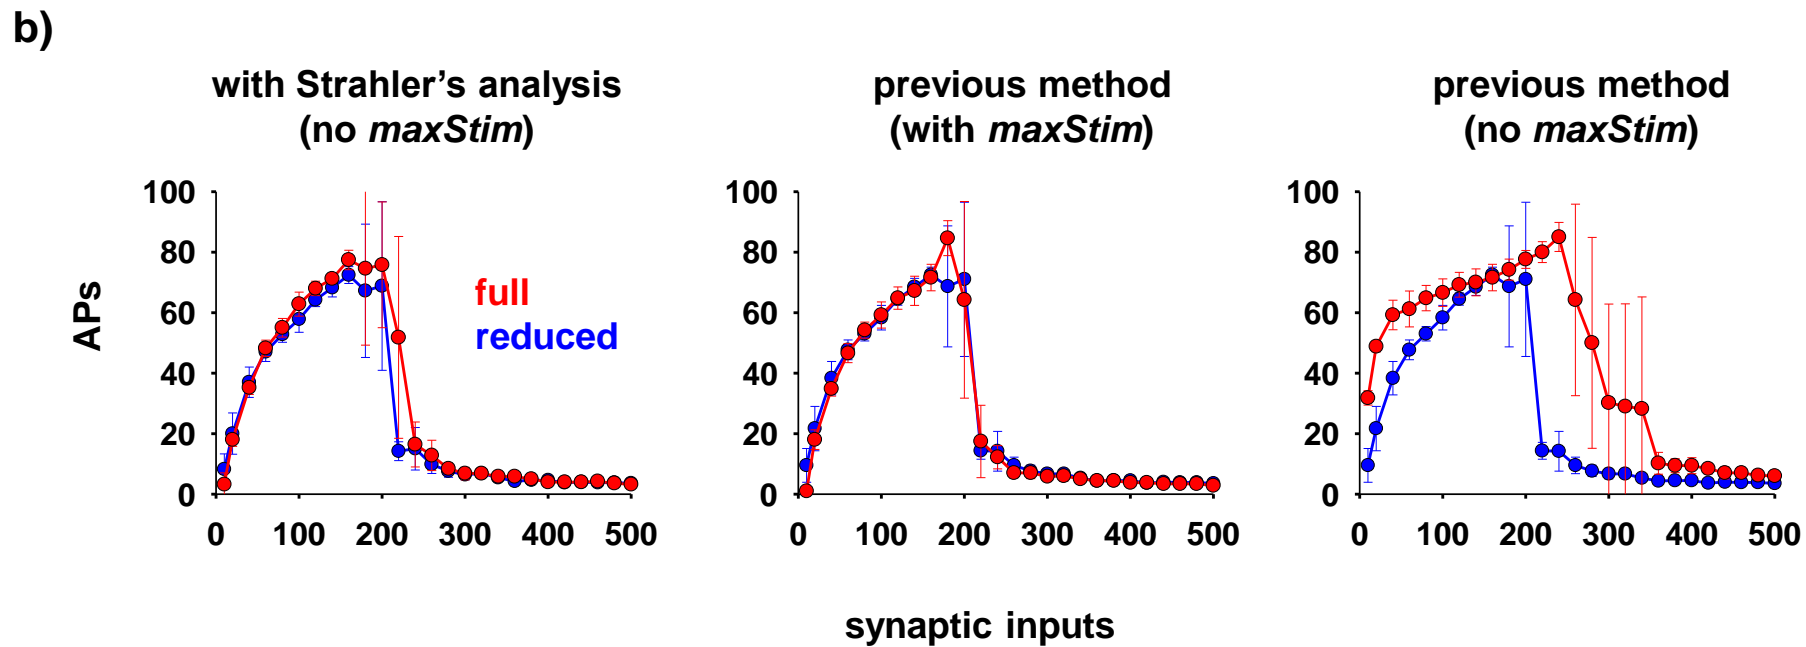

Supplement: srep02934-s1.pdf [file srep02934-s1.pdf]
